# Supplementary figures and images for: Genetic and immunohistochemical profiling of NK/T-cell lymphomas reveals prognostically relevant BCOR-MYC association
Source: PubMed Central journal article supplement — Blood Adv. 2022 Jul 28;7(1):178–89. doi: 10.1182/bloodadvances.2022007541 (PMC9837655; doi:10.1182/bloodadvances.2022007541), 2022-07-28

Supplemental Figure 1

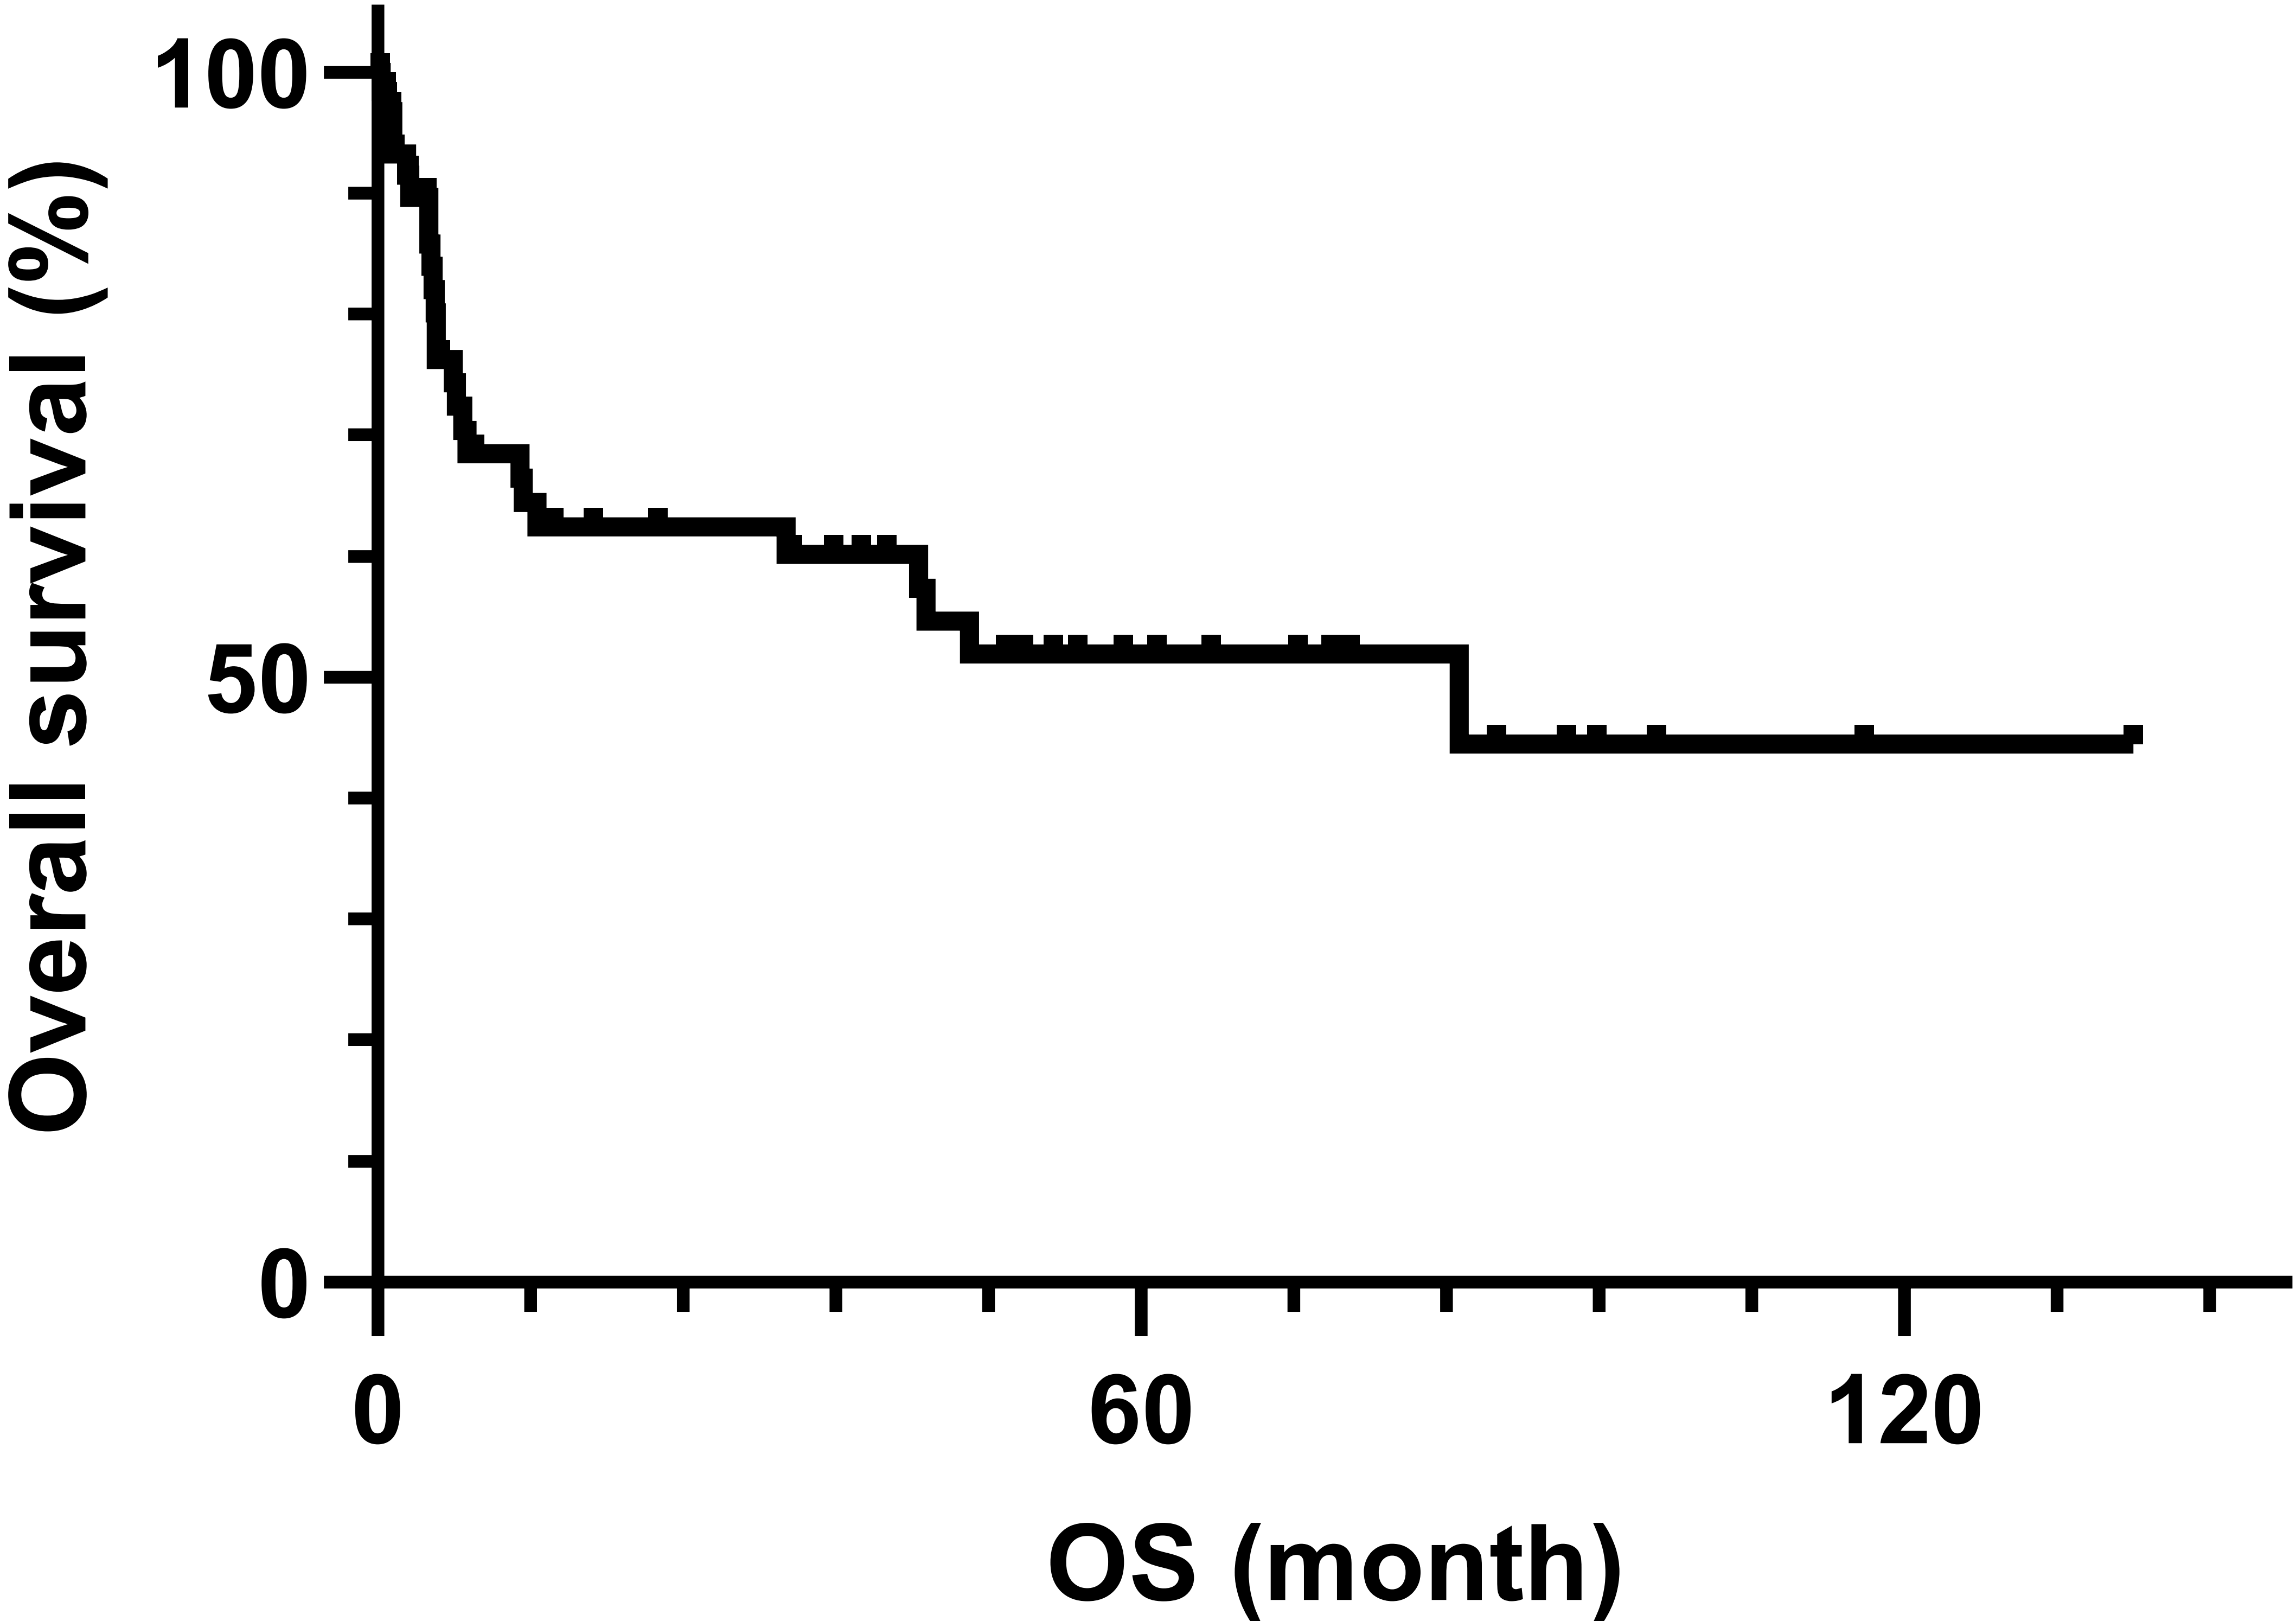

# Supplemental Figure 2

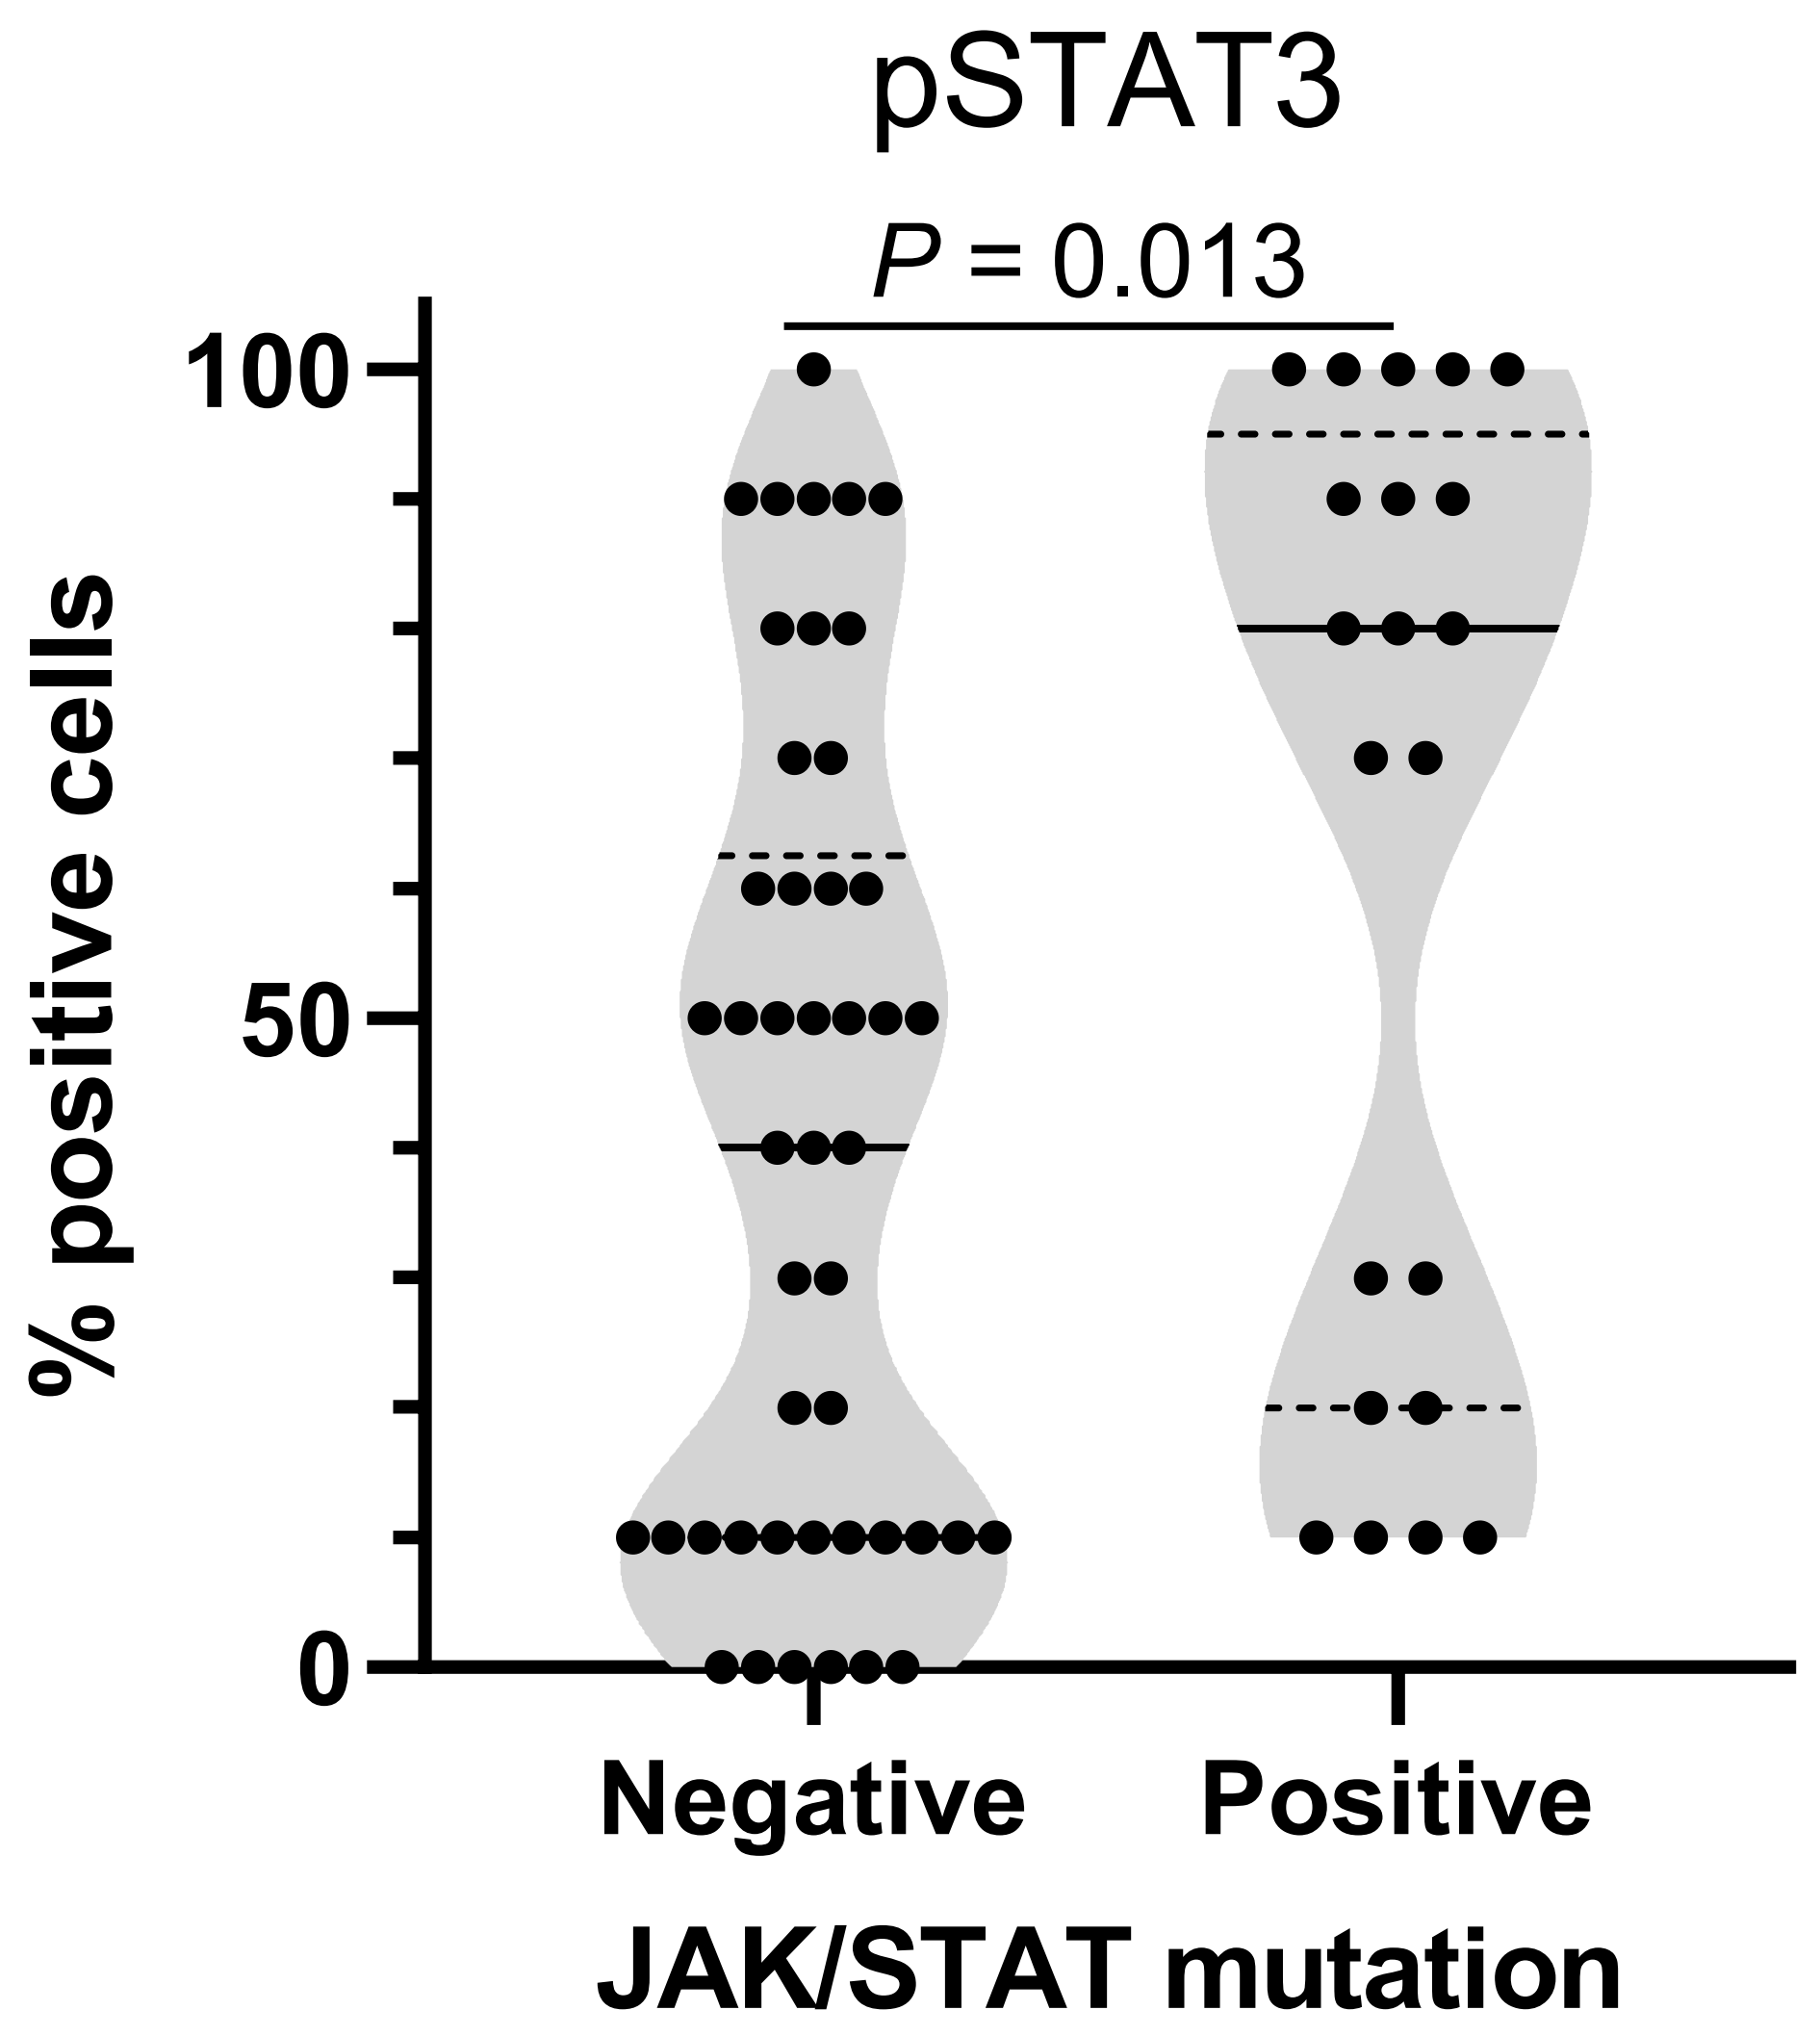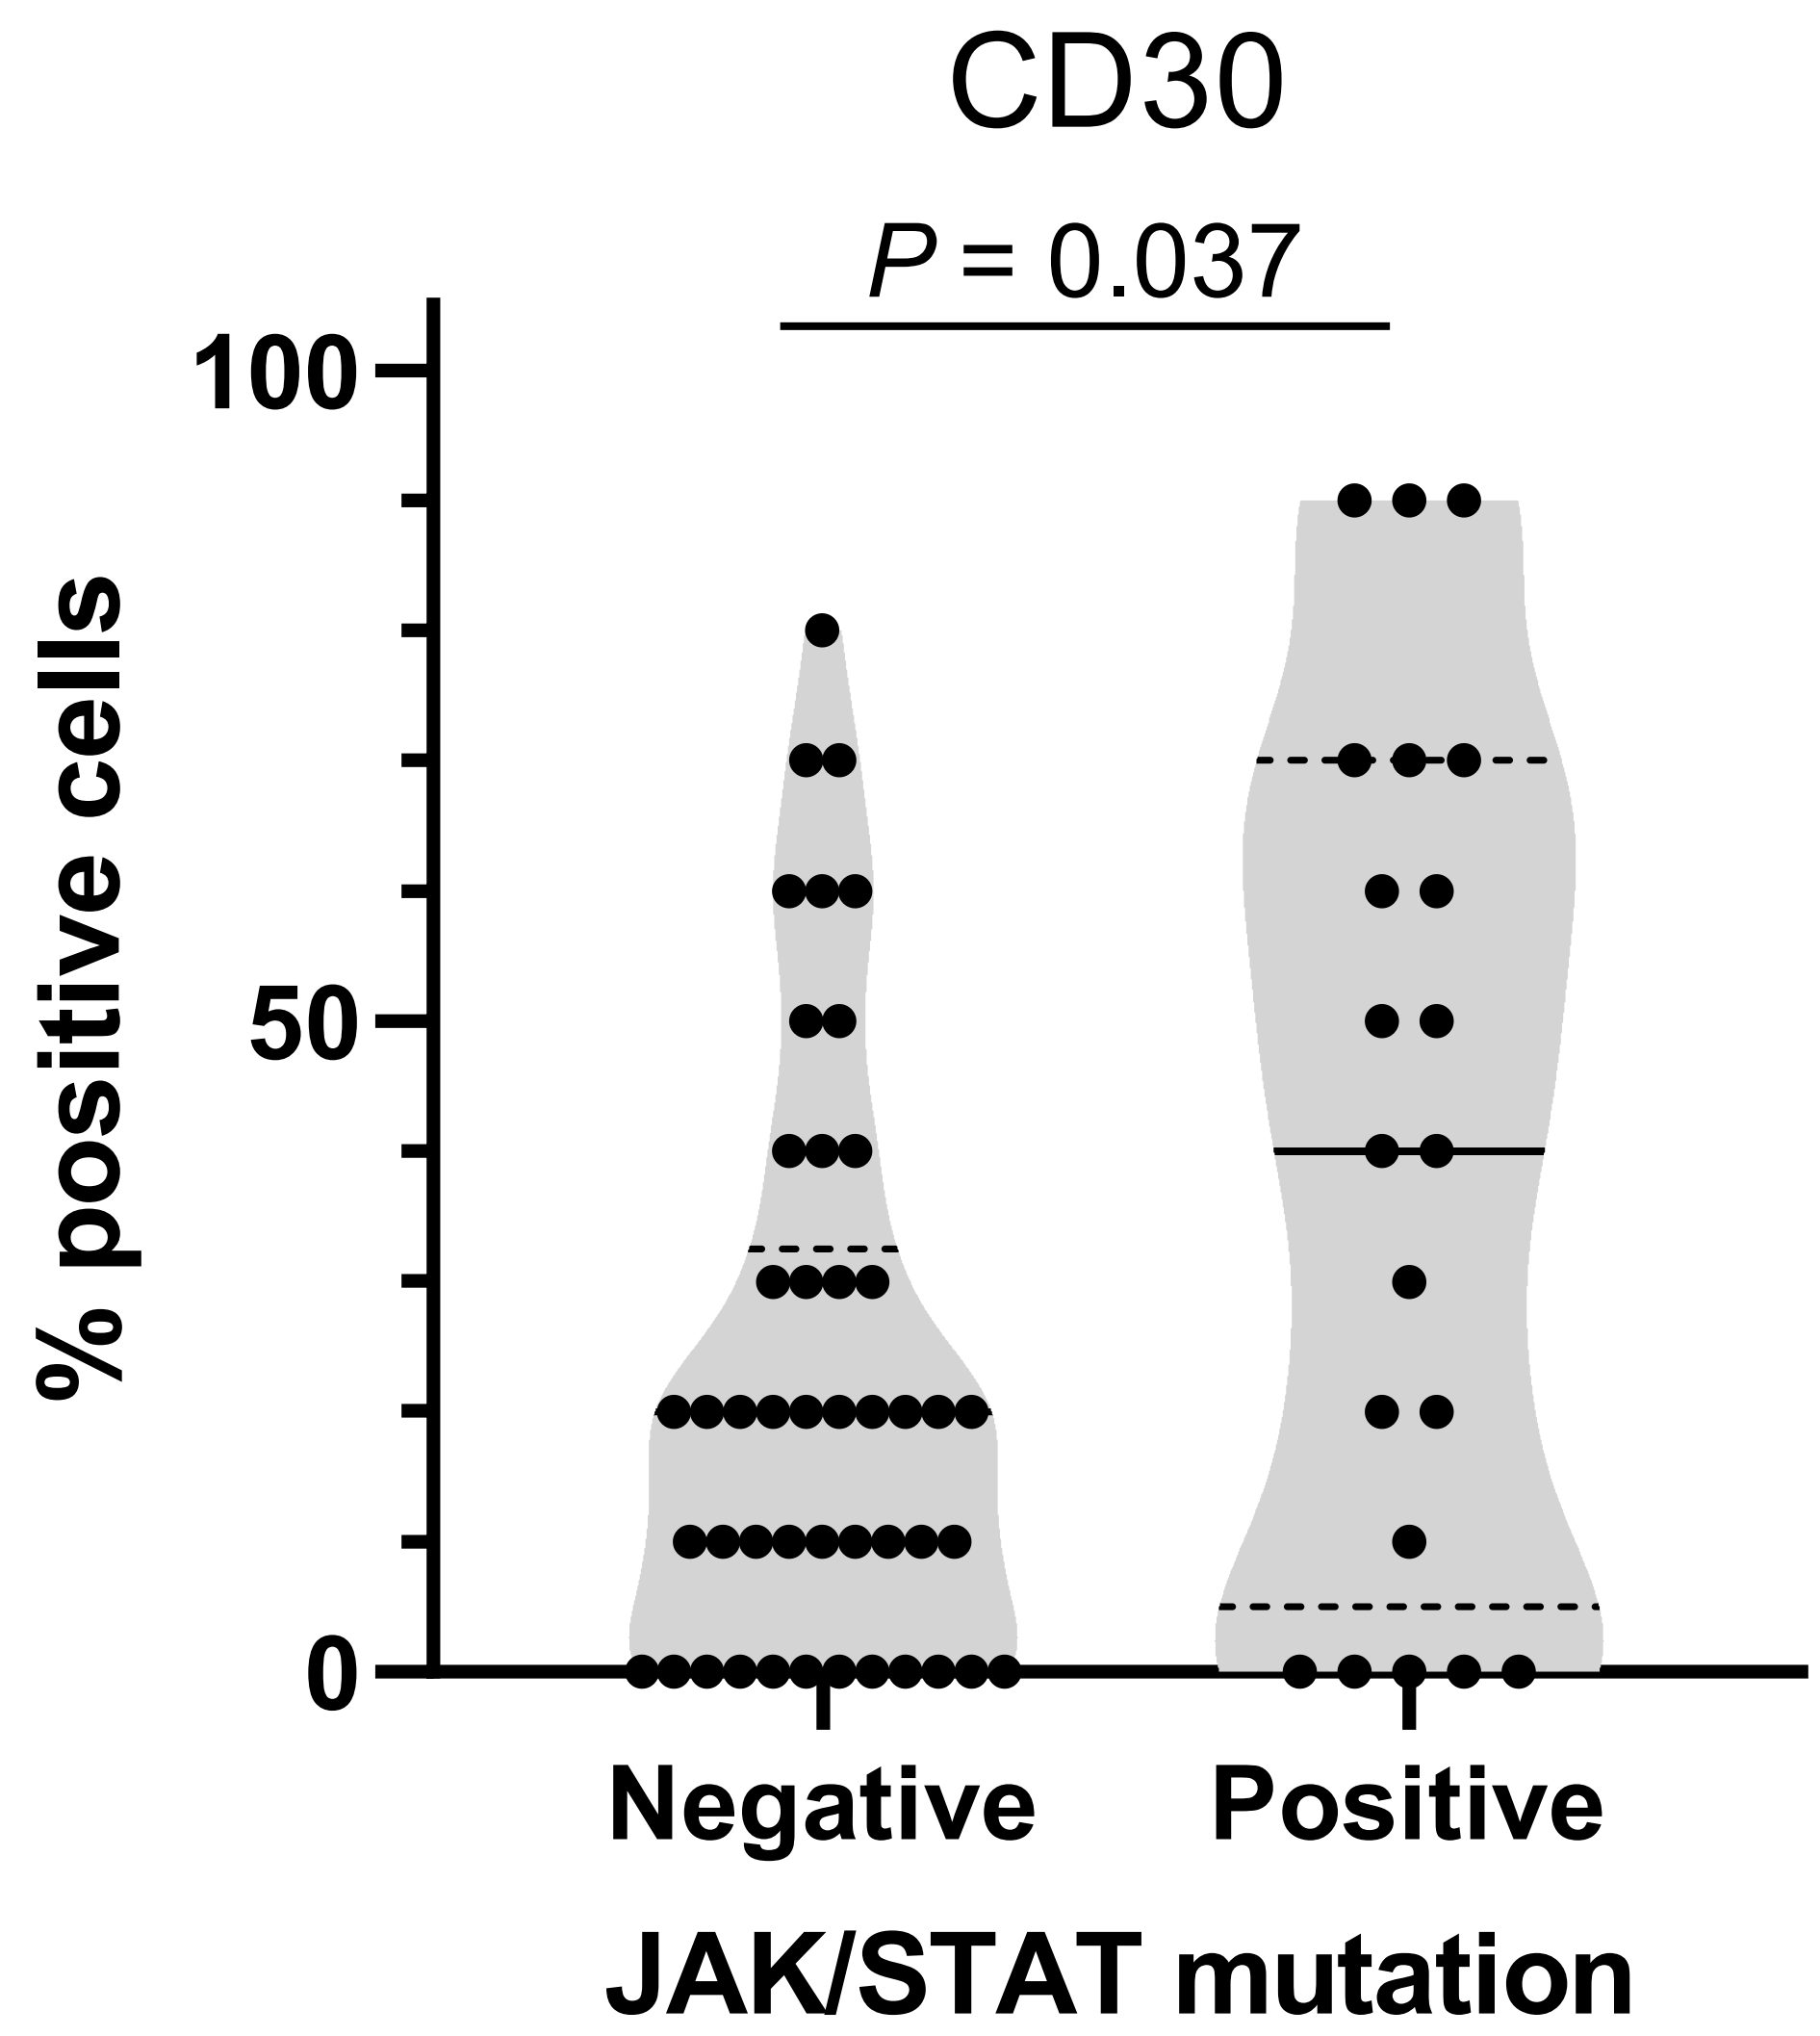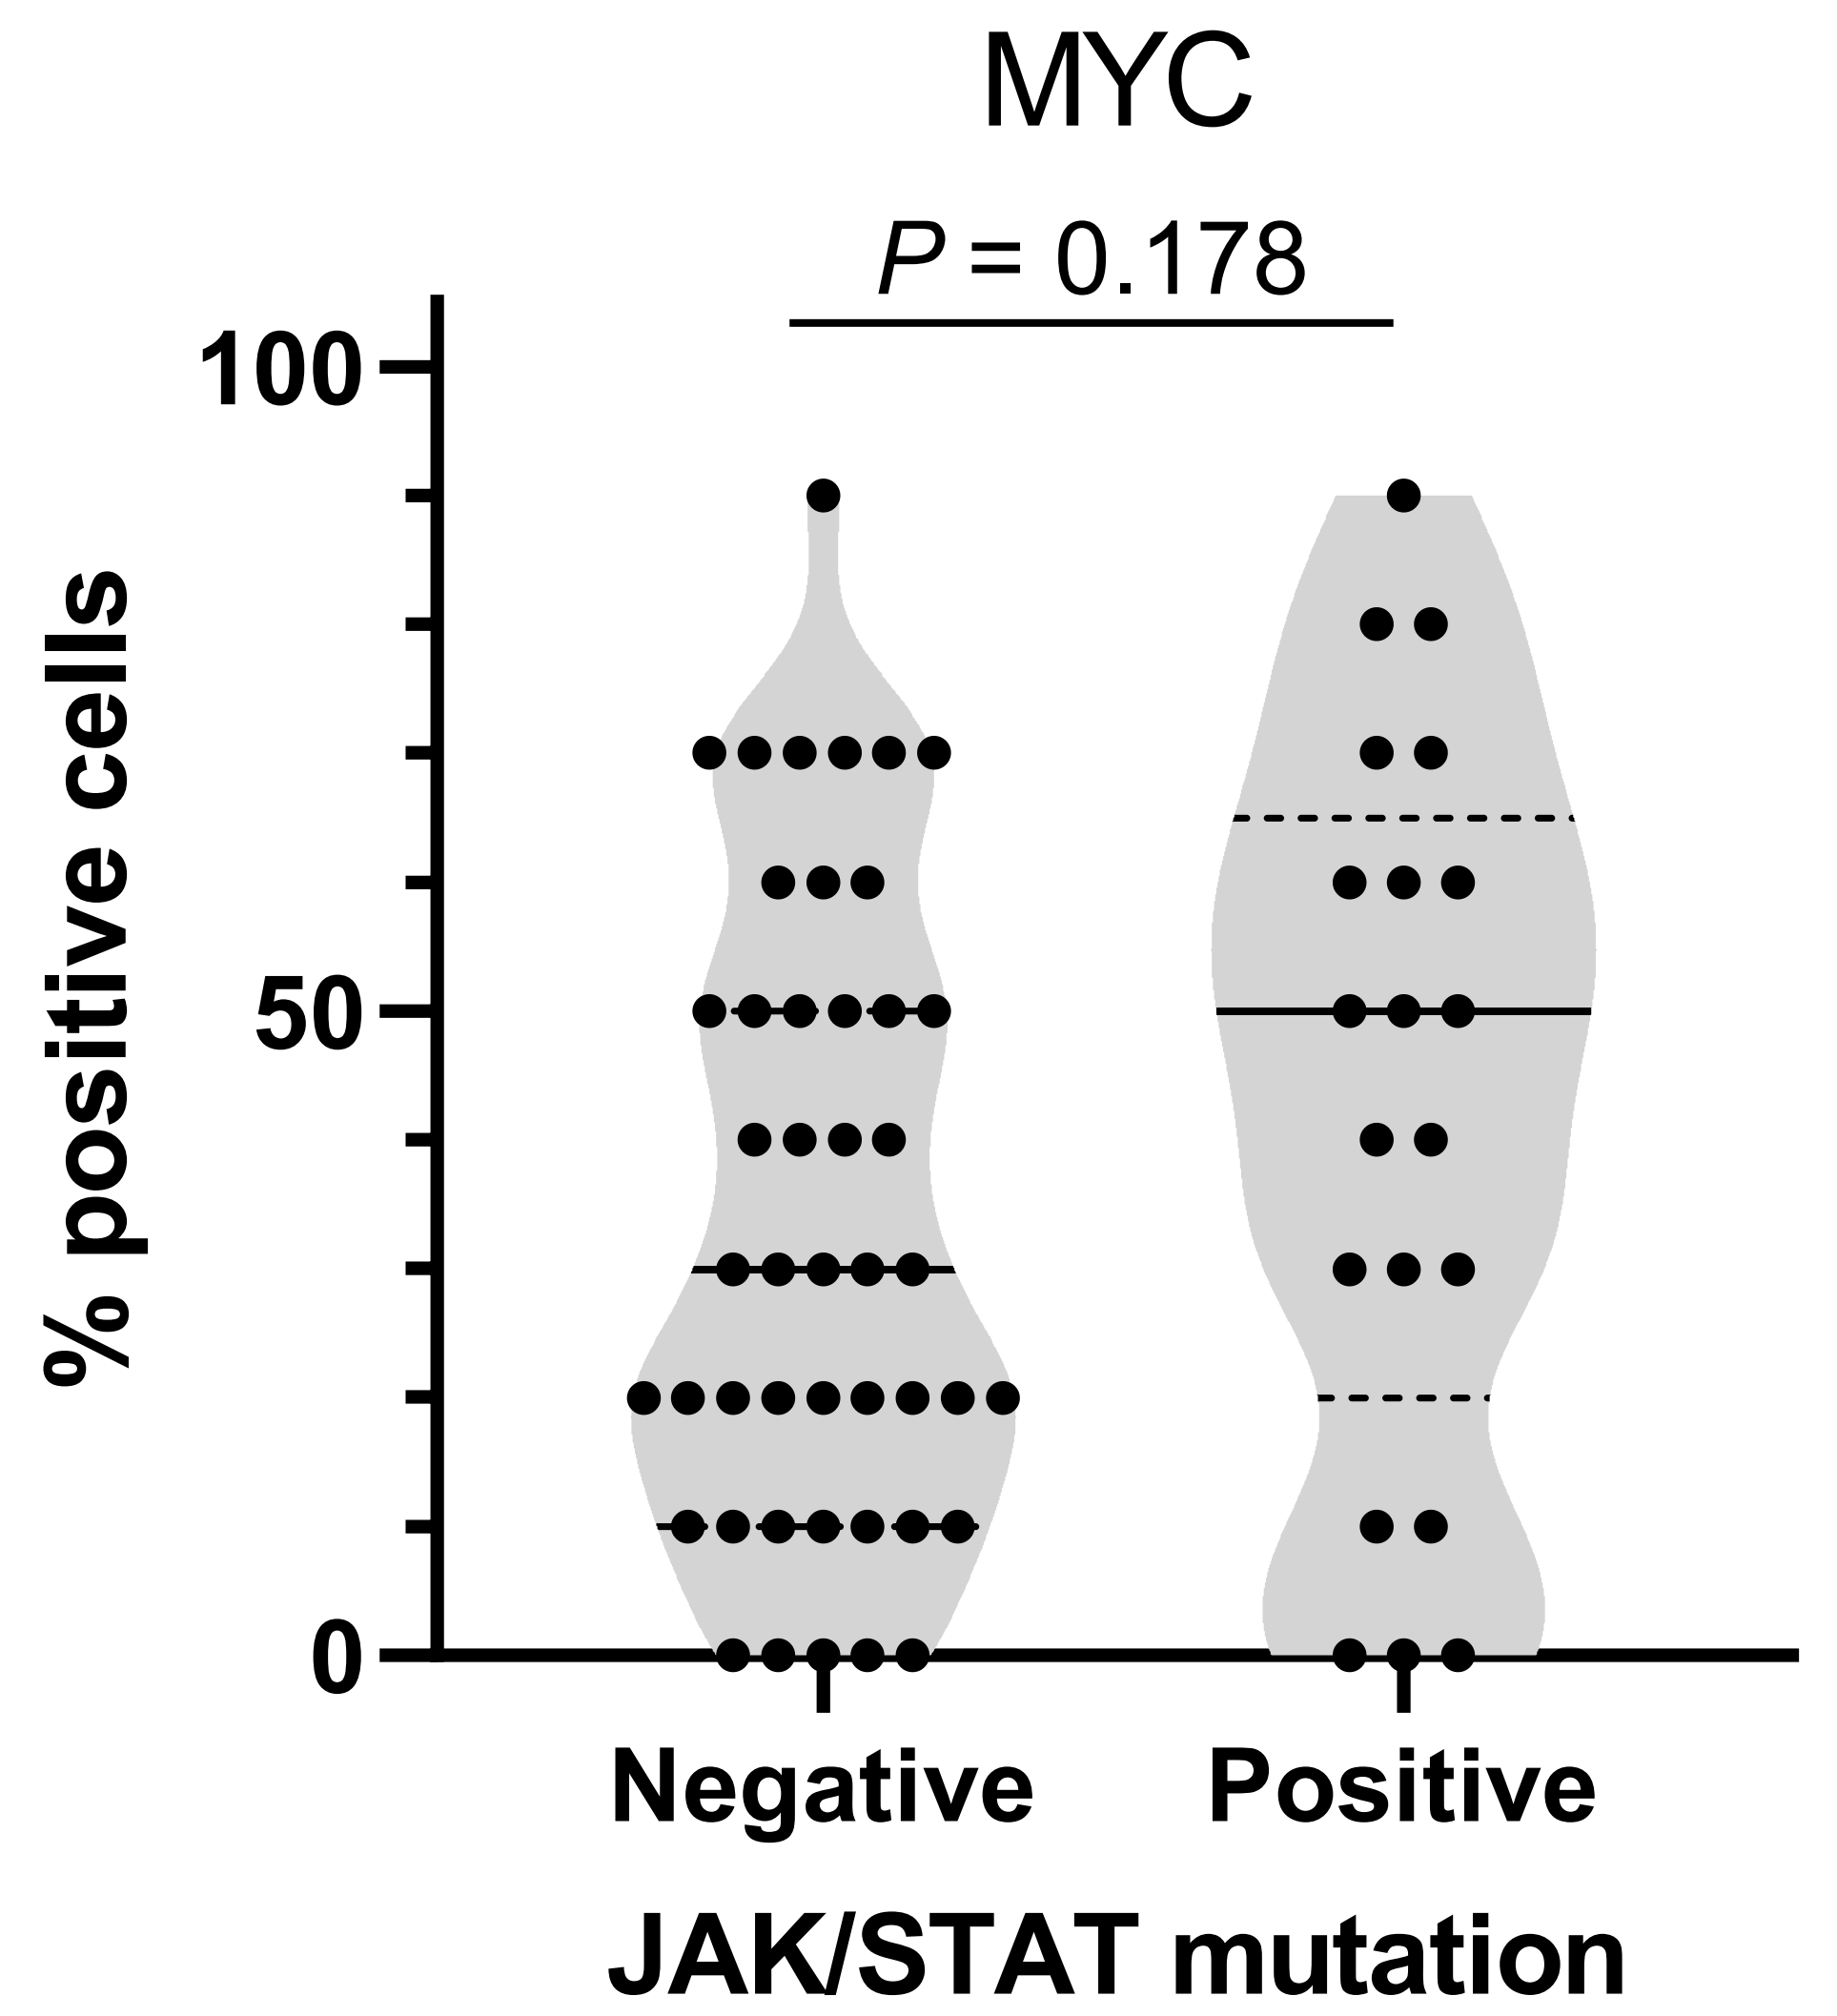

Supplement: BLOODA_ADV-2022-007541-mmc1.pdf [file BLOODA_ADV-2022-007541-mmc1.pdf]
